# Supplementary material for: Effect of Fermented Sarco Oyster (Crassostrea gigas) Extract on Muscle Strength Enhancement in Postmenopausal Females: A Randomized, Double-Blind, Placebo-Controlled Trial
Source: MDPI journal article supplement (doi:10.3390/ijerph192416450), 2022-12-08
Supplement: s1 [file s1]

## Supplementary materials

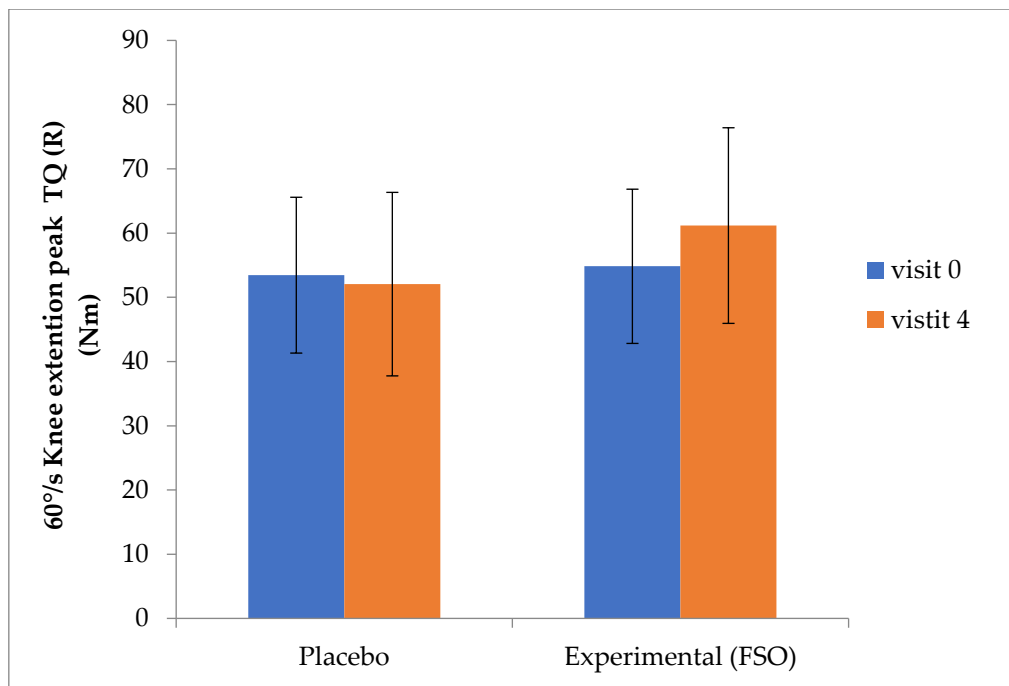

Figure S1. Measurement comparison of the 60°/s right knee extension peak TQ (Nm) in PP population. Each bar represents the mean  $\pm$  SD.

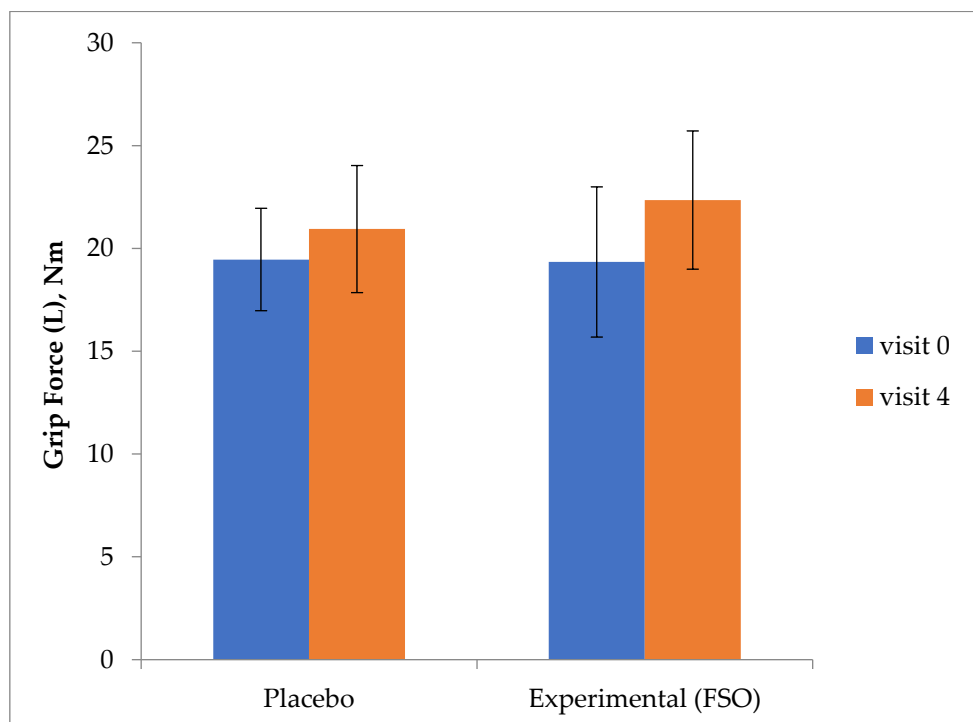

Figure S2. Measurement comparison of the left hand grip force (Nm) in PP population. Each bar represents the mean  $\pm$  SD.

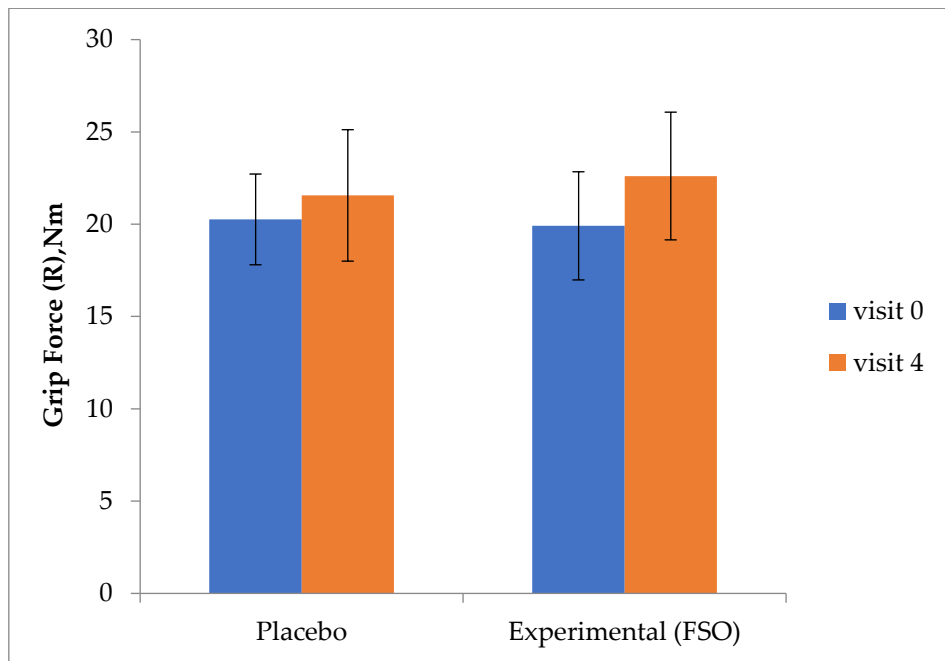

**Figure S3. Measurement comparison of the right hand grip force (Nm) in PP population. Each bar represents the mean  $\pm$  SD.**

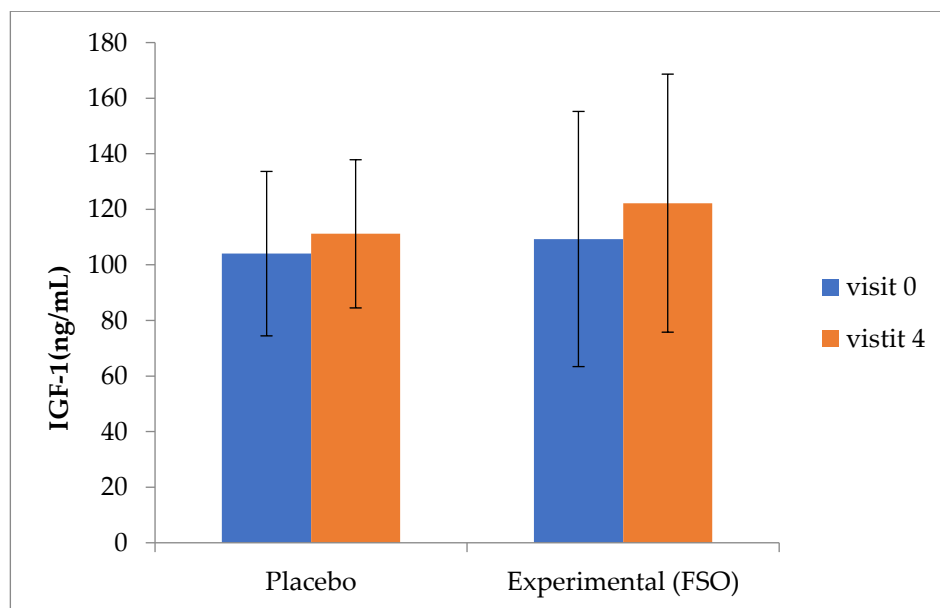

**Figure S4. Measurement comparison of IGF-1 level in PP population. Each bar represents the mean  $\pm$  SD.**

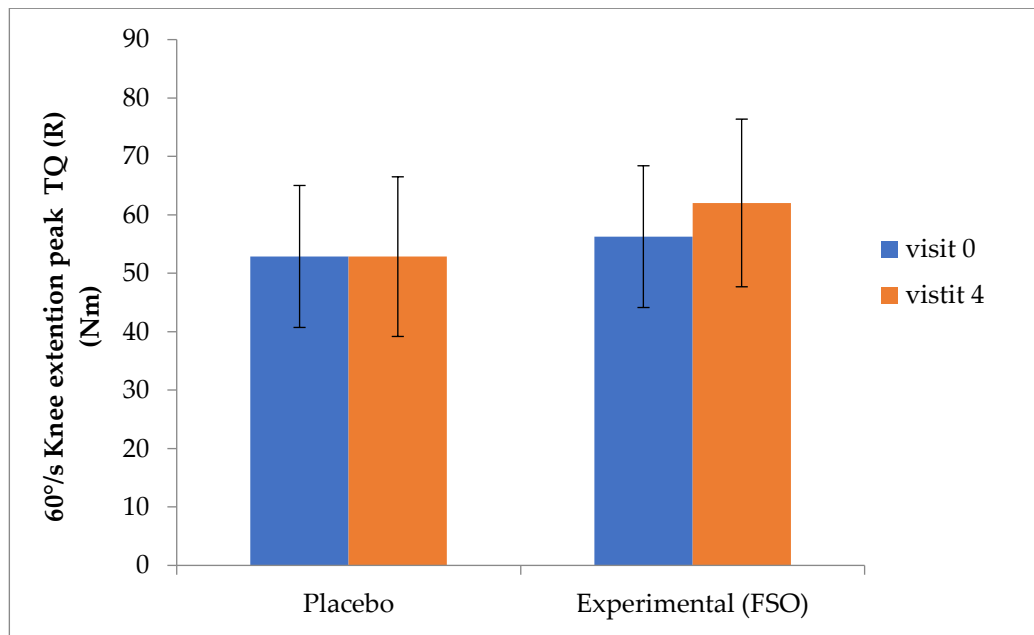

Figure S5. Measurement comparison of the 60°/s right knee extension peak TQ (Nm) in ITT population. Each bar represents the mean  $\pm$  SD.

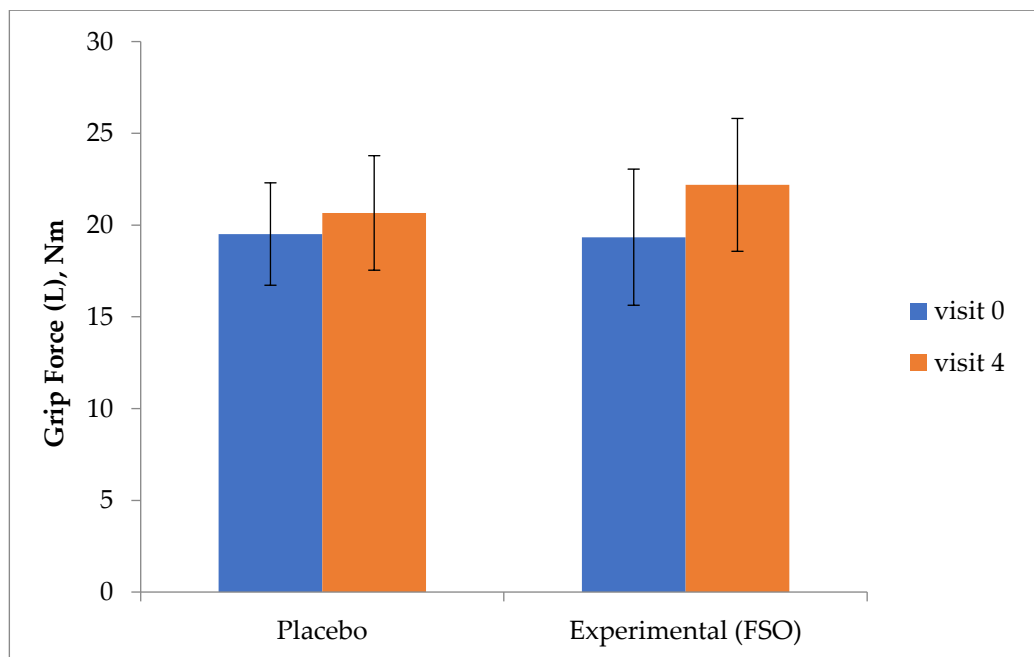

Figure S6. Measurement comparison of the left hand grip force (Nm) in ITT population. Each bar represents the mean  $\pm$  SD.

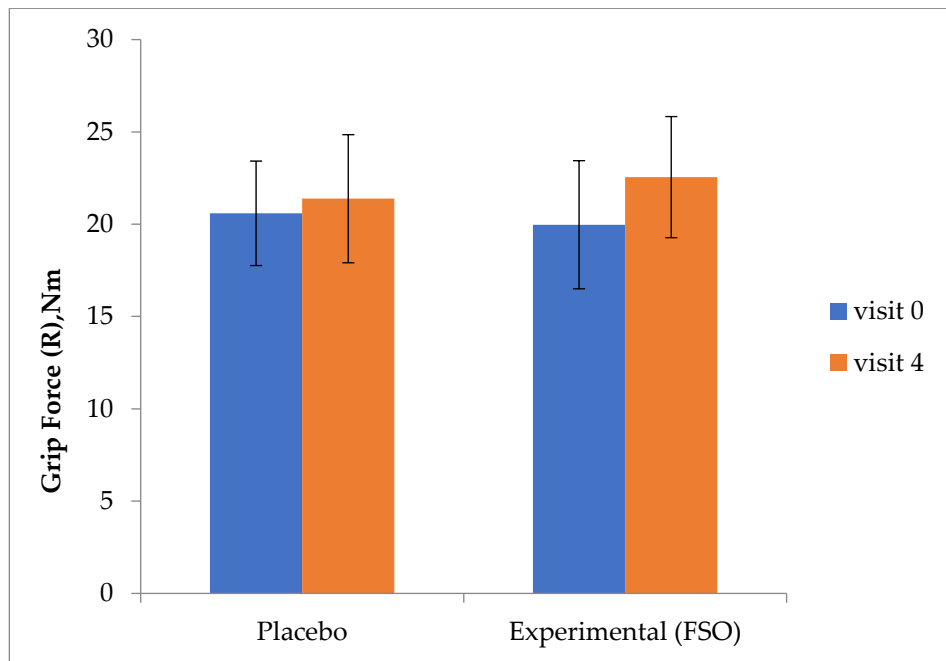

**Figure S7. Measurement comparison of the right hand grip force (Nm) in ITT population. Each bar represents the mean  $\pm$  SD.**

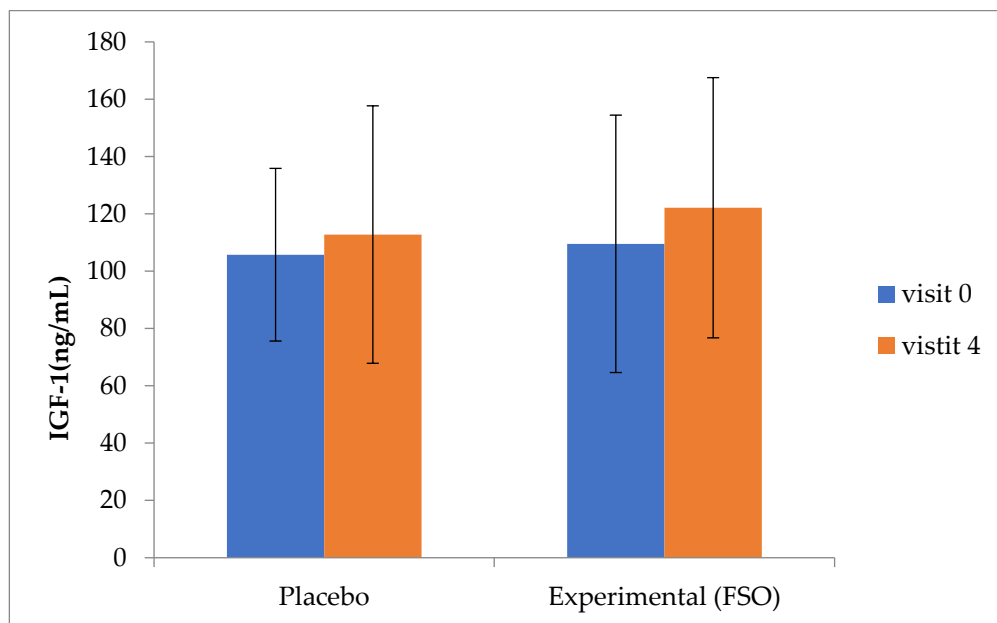

**Figure S8. Measurement comparison of IGF-1 level in ITT population. Each bar represents the mean  $\pm$  SD.**

**Supplementary Table S1.** Comparison between and within each group by (PP population)

| Variable                                     | Observed value |                     |           | Change from baseline |          |                     |          | p value** |
|----------------------------------------------|----------------|---------------------|-----------|----------------------|----------|---------------------|----------|-----------|
|                                              | Control (n=34) | Experimental (n=18) | p value** | Control (n=34)       | p value* | Experimental (n=18) | p value* |           |
| <b>60°/s knee extension peak TQ (R), Nm</b>  |                |                     |           |                      |          |                     |          |           |
| Visit 2                                      | 53.45±12.13    | 54.83±12.01         | 0.628     | -1.41±10.38          | 0.736    | 6.33±11.10          | 0.15*    | 0.037*    |
| Visit 4                                      | 52.05±14.29    | 61.17±15.23         | 0.056     |                      |          |                     |          |           |
| <b>60°/s knee flexion peak TQ (R), Nm</b>    |                |                     |           |                      |          |                     |          |           |
| Visit 2                                      | 28.23±9.44     | 32.50±9.29          | 0.512     | 3.63±9.46            | 0.096    | 1.50±9.87           | 0.545    | 0.477     |
| Visit 4                                      | 31.86±11.89    | 34.00±13.66         | 0.959     |                      |          |                     |          |           |
| <b>180°/s knee extension peak TQ (R), Nm</b> |                |                     |           |                      |          |                     |          |           |
| Visit 2                                      | 28.64±6.40     | 32.67±7.67          | 0.061     | 2.98±8.83            | 0.091    | 1.39±4.43           | 0.046*   | 0.530     |
| Visit 4                                      | 31.62±9.10     | 34.06±7.85          | 0.285     |                      |          |                     |          |           |
| <b>180°/s knee flexion peak TQ (R), Nm</b>   |                |                     |           |                      |          |                     |          |           |
| visit2                                       | 20.95±5.28     | 25.94±5.97          | 0.053     | 1.71±4.69            | 0.138    | -0.78±3.88          | 0.429    | 0.094     |
| visit4                                       | 22.67±6.27     | 25.17±6.10          | 0.539     |                      |          |                     |          |           |
| <b>60°/s knee extension peak TQ (L), Nm</b>  |                |                     |           |                      |          |                     |          |           |
| Visit 2                                      | 57.17±17.03    | 62.00±14.80         | 0.310     | -2.26±16.42          | 0.516    | -3.74±12.66         | 0.171    | 0.734     |
| Visit 4                                      | 54.91±12.99    | 58.26±16.88         | 0.455     |                      |          |                     |          |           |
| <b>60°/s knee flexion peak TQ (L), Nm</b>    |                |                     |           |                      |          |                     |          |           |
| Visit 2                                      | 31.8±12.4      | 32.3±13.5           | 0.892     | -4.26±7.59           | 0.013*   | -3.74±8.23          | 0.007*** | 0.824     |
| Visit 4                                      | 27.6±10.7      | 27.9±12.3           | 0.919     |                      |          |                     |          |           |
| <b>180°/s knee extension peak TQ (L), Nm</b> |                |                     |           |                      |          |                     |          |           |
| Visit 2                                      | 31.78±9.11     | 34.22±8.06          | 0.342     | -0.17±6.79           | 0.903    | -1.39±5.79          | 0.262    | 0.516     |
| Visit 4                                      | 31.61±7.00     | 32.83±6.57          | 0.546     |                      |          |                     |          |           |
| <b>180°/s knee flexion peak TQ (L), Nm</b>   |                |                     |           |                      |          |                     |          |           |
| visit2                                       | 22.61±6.32     | 23.91±5.98          | 0.476     | 0.17±5.32            | 0.640    | 0.13±3.96           | 0.876    | 0.975     |
| visit4                                       | 22.64±5.33     | 24.04±7.02          | 0.454     |                      |          |                     |          |           |

|                               |               |               |       |                |         |              |          |        |
|-------------------------------|---------------|---------------|-------|----------------|---------|--------------|----------|--------|
| <b>ASM/height<sup>2</sup></b> |               |               |       |                |         |              |          |        |
| visit2                        | 2.58±0.27     | 2.65±0.25     | 0.400 | -0.01±0.11     | 0.695   | -0.01±0.13   | 0.592    | 0.882  |
| visit4                        | 2.57±0.26     | 2.63±0.23     | 0.415 |                |         |              |          |        |
| <b>ASM/weight x 100</b>       |               |               |       |                |         |              |          |        |
| visit2                        | 10.45±0.75    | 10.84±1.05    | 0.152 | -0.17±0.46     | 0.094   | -0.11±6.62   | 0.388    | 0.729  |
| visit4                        | 10.28±0.64    | 10.73±0.92    | 0.061 |                |         |              |          |        |
| <b>Total Body Fat</b>         |               |               |       |                |         |              |          |        |
| visit2                        | 37.67±4.56    | 35.40±6.54    | 0.177 | 0.70±1.61      | 0.051   | 0.87±1.13    | 0.001*** | 0.674  |
| visit4                        | 38.99±4.02    | 36.56±6.55    | 0.202 |                |         |              |          |        |
| <b>Abdominal Fat</b>          |               |               |       |                |         |              |          |        |
| visit2                        | 118.4±28.4    | 106.7±39.8    | 0.260 | 9.77±16.39     | 0.009** | 8.93±7.96    | 0.000*** | 0.827  |
| visit4                        | 128.2±25.9    | 115.7±41.3    | 0.226 |                |         |              |          |        |
| <b>Grip Force (L), Nm</b>     |               |               |       |                |         |              |          |        |
| visit2                        | 19.46±2.49    | 19.34±3.65    | 0.901 | 1.48±2.31      | 0.006** | 3.00±2.49    | 0.000*** | 0.036* |
| visit4                        | 20.94±3.09    | 22.35±3.36    | 0.146 |                |         |              |          |        |
| <b>Grip Force (R), Nm</b>     |               |               |       |                |         |              |          |        |
| visit2                        | 20.26±2.46    | 19.91±2.93    | 0.667 | 1.60±2.07      | 0.006** | 2.70±1.47    | 0.000*** | 0.011* |
| visit4                        | 21.56±3.56    | 22.61±3.46    | 0.315 |                |         |              |          |        |
| <b>Pyruvate</b>               |               |               |       |                |         |              |          |        |
| visit2                        | 0.545±0.150   | 0.574±0.163   | 0.546 | 0.03±0.20      | 0.753   | 0.03±0.17    | 0.390    | 0.962  |
| visit4                        | 0.557±0.122   | 0.604±0.136   | 0.229 |                |         |              |          |        |
| <b>Lactate</b>                |               |               |       |                |         |              |          |        |
| visit2                        | 8.17±1.90     | 9.38±3.70     | 0.321 | 1.79±3.38      | 0.018*  | 1.34±2.90    | 0.037*   | 0.632  |
| visit4                        | 10.00±3.83    | 10.72±4.02    | 0.694 |                |         |              |          |        |
| <b>IGF-1 (ng/mL)</b>          |               |               |       |                |         |              |          |        |
| visit2                        | 104.04±29.58  | 109.31±45.91  | 0.646 | 7.13±25.18     | 0.188   | 12.91±23.36  | 0.015*   | 0.424  |
| visit4                        | 111.17±26.67  | 122.22±46.43  | 0.329 |                |         |              |          |        |
| <b>hsCRP</b>                  |               |               |       |                |         |              |          |        |
| visit2                        | 0.15±0.25     | 0.16±0.36     | 0.949 | -0.032±0.167   | 0.371   | 0.066±0.343  | 0.369    | 0.228  |
| visit4                        | 0.12±0.11     | 0.22±0.69     | 0.492 |                |         |              |          |        |
| <b>EQ-5D-3L</b>               |               |               |       |                |         |              |          |        |
| visit2                        | 0.822±0.186   | 0.798±0.178   | 0.663 | 0.049±0.156    | 0.144   | 0.061±0.124  | 0.027*   | 0.775  |
| visit4                        | 0.871±0.173   | 0.859±0.157   | 0.812 |                |         |              |          |        |
| <b>VAS</b>                    |               |               |       |                |         |              |          |        |
| visit2                        | 0.782±0.226   | 0.771±0.209   | 0.862 | 0.061±0.169    | 0.098   | 0.074±0.140  | 0.019*   | 0.778  |
| visit4                        | 0.843±0.215   | 0.845±0.172   | 0.975 |                |         |              |          |        |
| <b>IPAQ</b>                   |               |               |       |                |         |              |          |        |
| visit2                        | 1968.8±1655.9 | 2216.9±1241.1 | 0.579 | 796.36±1746.13 | 0.053   | 268.2±1302.9 | 0.334    | 0.255  |
| visit4                        | 2676.6±2393.4 | 2485.1±1089.4 | 0.730 |                |         |              |          |        |
| <b>Dietary Intake</b>         |               |               |       |                |         |              |          |        |
| visit2                        | 1699.1±359.8  | 1562.4±479.8  | 0.280 | -53.19±316.44  | 0.429   | 50.72±280.54 | 0.395    | 0.245  |
| visit4                        | 1645.9±410.4  | 1613.1±512.0  | 0.812 |                |         |              |          |        |

The data is expressed as the mean ± SD for pre and post outcomes and comparison between two groups.

\* P values were compared within each group.

\*\* P values were compared between groups. Results with statistically significant differences are indicated in bold.

**Supplementary Table S2.** Comparison between and within each group (ITT population)

| Variable                                     | Observed value |                     |           | Change from baseline |          |                     |          | p value** |
|----------------------------------------------|----------------|---------------------|-----------|----------------------|----------|---------------------|----------|-----------|
|                                              | Control (n=34) | Experimental (n=18) | p value** | Control (n=34)       | p value* | Experimental (n=18) | p value* |           |
| <b>60°/s knee extension peak TQ (R), Nm</b>  |                |                     |           |                      |          |                     |          |           |
| Visit 2                                      | 52.88±12.15    | 56.21±12.13         | 0.320     | -0.04±10.13          | 0.985    | 5.77±10.58          | 0.010**  | 0.048     |
| Visit 4                                      | 52.85±13.66    | 62.04±14.35         | 0.023*    |                      |          |                     |          |           |
| <b>60°/s knee flexion peak TQ (R), Nm</b>    |                |                     |           |                      |          |                     |          |           |
| Visit 2                                      | 28.46±9.24     | 31.00±9.90          | 0.344     | 2.99±9.43            | 0.118    | 1.50±9.33           | 0.607    | 0.567     |
| Visit 4                                      | 31.46±11.86    | 32.50±13.29         | 0.768     |                      |          |                     |          |           |
| <b>180°/s knee extension peak TQ (R), Nm</b> |                |                     |           |                      |          |                     |          |           |
| Visit 2                                      | 29.19±6.33     | 32.98±8.19          | 0.072     | 2.64±8.47            | 0.123    | 1.88±4.21           | 0.031*   | 0.680     |
| Visit 4                                      | 31.83±8.61     | 34.81±8.04          | 0.206     |                      |          |                     |          |           |
| <b>180°/s knee flexion peak TQ (R), Nm</b>   |                |                     |           |                      |          |                     |          |           |
| visit 2                                      | 21.58±5.13     | 24.92±5.70          | 0.031*    | 0.87±5.62            | 0.429    | -1.00±4.18          | 0.233    | 0.176     |
| visit 4                                      | 22.45±6.31     | 23.92±6.19          | 0.403     |                      |          |                     |          |           |
| <b>60°/s knee extension peak TQ (L), Nm</b>  |                |                     |           |                      |          |                     |          |           |
| Visit 2                                      | 57.58±16.48    | 62.27±14.89         | 0.287     | -2.31±15.42          | 0.368    | -4.19±11.98         | 0.087    | 0.625     |
| Visit 4                                      | 55.27±12.70    | 58.08±16.84         | 0.500     |                      |          |                     |          |           |
| <b>60°/s knee flexion peak TQ (L), Nm</b>    |                |                     |           |                      |          |                     |          |           |
| Visit 2                                      | 29.73±13.08    | 31.11±12.83         | 0.668     | -2.88±8.33           | 0.090    | -0.38±5.32          | 0.230    | 0.203     |
| Visit 4                                      | 26.85±10.34    | 30.31±12.87         | 0.290     |                      |          |                     |          |           |
| <b>180°/s knee extension peak TQ (L), Nm</b> |                |                     |           |                      |          |                     |          |           |
| Visit 2                                      | 31.27±9.04     | 34.54±8.35          | 0.182     | 0.38±6.66            | 0.771    | -1.42±6.13          | 0.247    | 0.313     |
| Visit 4                                      | 31.65±7.10     | 33.12±8.75          | 0.511     |                      |          |                     |          |           |
| <b>180°/s knee flexion peak TQ (L), Nm</b>   |                |                     |           |                      |          |                     |          |           |
| visit 2                                      | 21.92±6.39     | 23.69±5.76          | 0.300     | 0.31±5.30            | 0.801    | 0.54±4.34           | 0.531    | 0.864     |

|                               |              |              |       |             |          |                |          |         |
|-------------------------------|--------------|--------------|-------|-------------|----------|----------------|----------|---------|
| visit 4                       | 22.08±6.02   | 24.23±6.87   | 0.241 |             |          |                |          |         |
| <b>ASM/height<sup>2</sup></b> |              |              |       |             |          |                |          |         |
| visit 2                       | 2.59±0.26    | 2.65±0.24    | 0.428 | -0.02±0.11  | 0.465    | -0.01±0.12     | 0.696    | 0.839   |
| visit 4                       | 2.58±0.26    | 2.64±0.22    | 0.357 |             |          |                |          |         |
| <b>ASM/weight x 100</b>       |              |              |       |             |          |                |          |         |
| visit 2                       | 10.40±0.74   | 10.83±1.03   | 0.085 | 0.18±0.46   | 0.053    | -0.10±0.58     | 0.379    | 0.580   |
| visit 4                       | 10.22±0.66   | 10.73±0.91   | 0.023 |             |          |                |          |         |
| <b>Total Body Fat</b>         |              |              |       |             |          |                |          |         |
| visit 2                       | 37.63±4.63   | 35.05±6.51   | 0.066 | 0.66±1.53   | 0.037*   | 0.83±1.09      | 0.001**  | 0.674   |
| visit 4                       | 38.29±4.65   | 35.88±6.37   | 0.074 |             |          |                |          |         |
| <b>Abdominal Fat</b>          |              |              |       |             |          |                |          |         |
| visit 2                       | 118.56±34.10 | 106.85±38.86 | 0.240 | 9.77±16.39  | 0.004*** | 5.28±27.29     | 0.000*** | 0.472   |
| visit 4                       | 128.20±32.11 | 116.28±40.49 | 0.240 |             |          |                |          |         |
| <b>Grip Force (L), Nm</b>     |              |              |       |             |          |                |          |         |
| visit 2                       | 19.51±2.79   | 19.34±2.80   | 0.853 | 1.15±2.87   | 0.057    | 2.85±2.39      | 0.000*** | 0.025** |
| visit 4                       | 20.66±3.12   | 22.19±3.62   | 0.112 |             |          |                |          |         |
| <b>Grip Force (R),Nm</b>      |              |              |       |             |          |                |          |         |
| visit 2                       | 20.59±2.83   | 19.97±2.80   | 0.439 | 0.79±2.94   | 0.192    | 2.58±1.44      | 0.000*** | 0.010** |
| visit 4                       | 21.38±3.47   | 22.55±3.28   | 0.221 |             |          |                |          |         |
| <b>Pyruvate</b>               |              |              |       |             |          |                |          |         |
| visit 2                       | 0.56±0.16    | 0.58±0.16    | 0.785 | 0.02±0.21   | 0.651    | 0.030.651±0.16 | 0.398    | 0.852   |
| visit 4                       | 0.55±0.12    | 0.60±0.13    | 0.620 |             |          |                |          |         |
| <b>Lactate</b>                |              |              |       |             |          |                |          |         |
| visit 2                       | 8.23±1.88    | 9.62±3.82    | 0.227 | 1.58±3.47   | 0.036*   | 1.28±2.86      | 0.039*   | 0.745   |
| visit 4                       | 9.83±3.83    | 10.90±4.03   | 0.486 |             |          |                |          |         |
| <b>IGF-1 (ng/mL)</b>          |              |              |       |             |          |                |          |         |
| visit 2                       | 105.75±30.12 | 109.54±44.92 | 0.733 | 7.03±24.64  | 0.176    | 11.80±22.77    | 0.013*   | 0.422   |
| visit 4                       | 112.77±27.23 | 122.13±45.47 | 0.391 |             |          |                |          |         |
| <b>hsCRP</b>                  |              |              |       |             |          |                |          |         |
| visit 2                       | 0.15±0.25    | 0.16±0.35    | 0.830 | -0.03±0.16  | 0.371    | 0.05±0.33      | 0.440    | 0.276   |
| visit 4                       | 0.12±0.11    | 0.22±0.68    | 0.463 |             |          |                |          |         |
| <b>EQ-5D-3L</b>               |              |              |       |             |          |                |          |         |
| visit 2                       | 0.827±0.187  | 0.783±0.205  | 0.426 | 0.041±0.148 | 0.169    | 0.066±0.126    | 0.014*   | 0.524   |

|                       |               |               |       |              |       |              |        |       |
|-----------------------|---------------|---------------|-------|--------------|-------|--------------|--------|-------|
| visit 4               | 0.868±0.179   | 0.849±0.164   | 0.688 |              |       |              |        |       |
| <b>VAS</b>            |               |               |       |              |       |              |        |       |
| visit 2               | 0.790±0.226   | 0.747±0.254   | 0.526 |              |       |              |        |       |
| visit 4               | 0.840±0.220   | 0.831±0.182   | 0.868 | 0.050±0.162  | 0.126 | 0.084±0.155  | 0.011* | 0.454 |
| <b>IPAQ</b>           |               |               |       |              |       |              |        |       |
| visit 2               | 1744.7±1555.0 | 2155.1±1250.9 | 0.311 |              |       |              |        |       |
| visit 4               | 2451.3±1995.3 | 2466±1069.5   | 0.974 | 623.8±1551.7 | 0.061 | 311.0±1291.4 | 0.250  | 0.452 |
| <b>Dietary Intake</b> |               |               |       |              |       |              |        |       |
| visit 2               | 1745.8±373.2  | 1609.8±477.2  | 0.258 |              |       |              |        |       |
| visit 4               | 1698.6±414.4  | 1671.7±522.6  | 0.838 | -47.2±302.0  | 0.433 | 61.9±270.1   | 0.254  | 0.176 |

The data is expressed as the mean ± SD for pre and post outcomes and comparison between two groups.

\* P values were compared within each group.

\*\* P values were compared between groups.
